# Supplementary material for: The Predictors of Early Treatment Effectiveness of Intravitreal Bevacizumab Application in Patients with Diabetic Macular Edema
Source: MDPI journal article supplement (doi:10.3390/diagnostics14100992), 2024-05-10
Supplement: s1 [file s1]

## Supplementary files

**Supplementary Table S1.** Comparison of peripheral blood counts and ratios in different stages of NPDR.

| Variable        | Diabetic retinopathy severity |                  |         |
|-----------------|-------------------------------|------------------|---------|
|                 | Moderate NPDR                 | Severe NPDR      | P-value |
| HDL-C/apoB      | 1.54 (1.17-1.98)              | 1.10 (0.89-1.60) | 0.012   |
| Monocyte/ApoA-I | 0.32 (0.25-0.39)              | 0.36 (0.27-0.43) | 0.243   |
| NLR             | 2.45 ± 1.05                   | 2.26 ± 0.73      | 0.465   |
| MLR             | 0.25 ± 0.09                   | 0.27 ± 0.10      | 0.334   |
| PLR             | 124.1 ± 47.5                  | 112.9 ± 58.0     | 0.396   |
| SII             | 579.7 ± 290.8                 | 492.5 ± 262.1    | 0.240   |

Values are presented as median (interquartile range). NPDR = nonproliferative diabetic retinopathy; ApoB/ApoA-I = apolipoprotein B to apolipoprotein A-I ratio; HDL-C/apoB = high-density lipoprotein cholesterol-to-apolipoprotein B ratio; Monocyte/ApoA-I = monocyte-to-apolipoprotein A-I ratio; NLR = neutrophil-to-lymphocyte ratio; MLR = monocyte-to-lymphocyte ratio; PLR = platelet-to-lymphocyte ratio; SII = systemic immune-inflammation index.

**Supplementary Table S2.** Correlation between change in CMT following bevacizumab therapy and selected biomarkers.

| Variable               | r-correlation coefficient* | P-value |
|------------------------|----------------------------|---------|
| Baseline BCVA (logMAR) | -0.224                     | 0.031   |
| Baseline CMT           | -0.310                     | 0.001   |
| Duration of DM         | 0.072                      | 0.530   |
| Baseline HbA1c         | -0.080                     | 0.489   |
| Vitamin D              | 0.105                      | 0.288   |
| ApoB/ApoA-I            | 0.054                      | 0.586   |
| HDL/apoB               | -0.083                     | 0.466   |
| Monocyte/ApoA-I        | 0.173                      | 0.130   |

\* Spearman's rank correlation coefficient BCVA = best-corrected visual acuity, CMT = central macular thickness; DM = diabetes mellitus; HbA1c = Haemoglobin A1c; ApoB/ApoA-I = apolipoprotein B to apolipoprotein A-I ratio; HDL/apoB = high-density lipoprotein cholesterol-to-apolipoprotein B ratio; Monocyte/ApoA-I = monocyte-to-apolipoprotein A-I ratio.
